# Supplementary material
Source: PubMed Central journal article supplement (PMC1693955)
Supplement: plntcell_tpc.106.046458_1.pdf [file plntcell_tpc.106.046458_1.pdf]

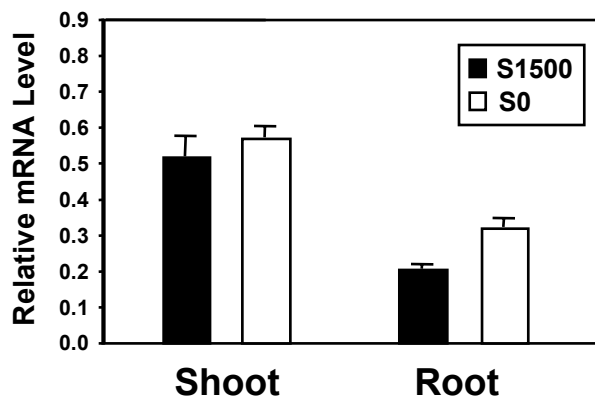

**Supplemental Figure 1.** *SLIM1* mRNA Content Is Not Modulated by Sulfur.

*SLIM1* mRNA levels in shoot and root samples were quantified by real-time RT-PCR, and the relative mRNA contents were calculated using ubiquitin as an internal standard. Plants were grown vertically for 10 days on S1500 or S0 agar medium. Values are presented by Means  $\pm$  SEs (n=3).
