# Supplementary material
Source: PubMed Central journal article supplement (PMC1693955)
Supplement: plntcell_tpc.106.046458_2.pdf [file plntcell_tpc.106.046458_2.pdf]

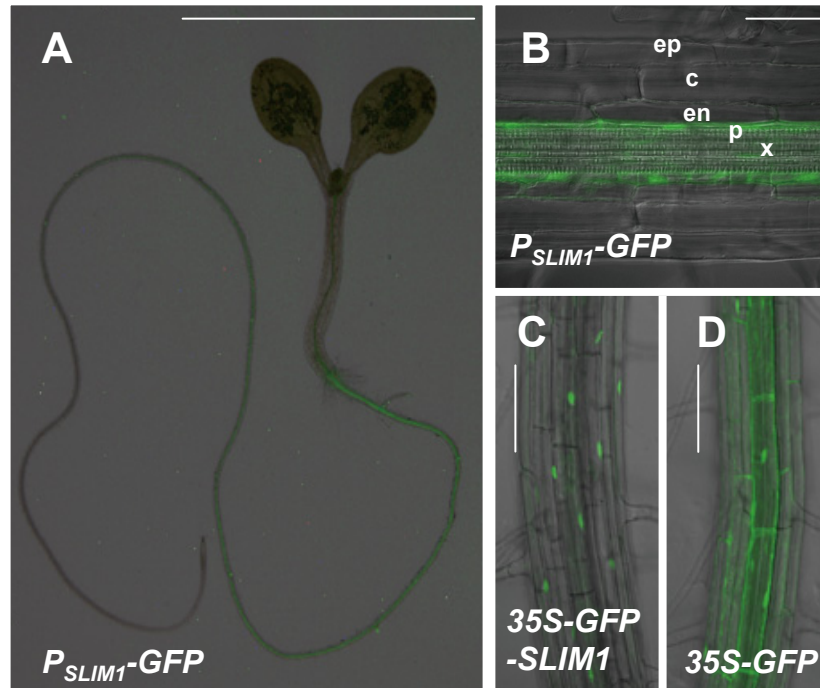

**Supplemental Figure 2.** Tissue and Cellular Distribution of SLIM1.

**(A)** Whole mount view of  $P_{SLIM1}$ -GFP plants grown for 6 days under S1500 (1500  $\mu$ M sulfate) condition. Bar=1 cm.

**(B)** Longitudinal view of the root tissues in (A). Bar=50  $\mu$ m. ep, epidermis; c, cortex; en, endodermis; p, pericycle; x, xylem.

**(C)** Nuclear localization of GFP-SLIM1 fusion protein in the root tissues of 35S-GFP-SLIM1 plants. Bar=100  $\mu$ m.

**(D)** 35S-GFP plants as a control of panel (C). Bar=100  $\mu$ m.
