# Supplementary material
Source: PubMed Central journal article supplement (PMC1693955)
Supplement: plntcell_tpc.106.046458_3.pdf [file plntcell_tpc.106.046458_3.pdf]

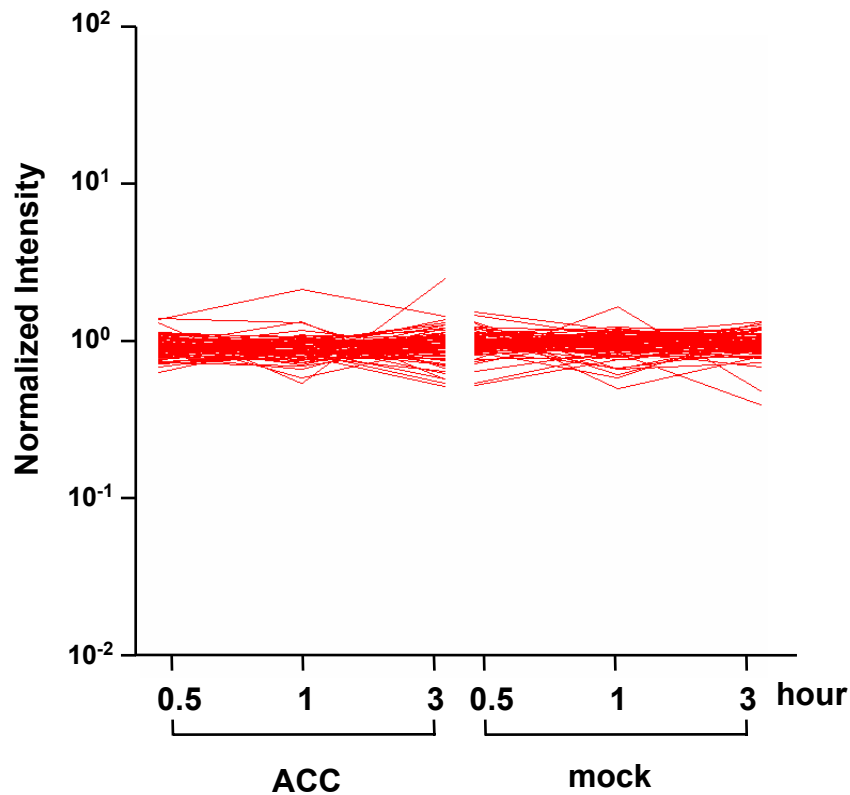

**Supplemental Figure 3.** ACC Response of –S-Regulated SLIM1-Dependent Genes.

Expression of –S-regulated SLIM1-dependent genes (Figure 5A) on a time course of 1-aminocyclopropane-1-carboxylic acid (ACC) treatment. Data was extracted from the microarray experiments done by Goda et al.

([http://www.arabidopsis.org/servlets/TairObject?type=expression\\_set&id=1007965762](http://www.arabidopsis.org/servlets/TairObject?type=expression_set&id=1007965762)). Lines show normalized expression levels of each array elements on 12 GeneChip data (duplicates of 3 time points for mock and ACC treatment).
