# Supplementary material
Source: PubMed Central journal article supplement (PMC1693955)
Supplement: plntcell_tpc.106.046458_5.pdf [file plntcell_tpc.106.046458_5.pdf]

**Supplemental Table 2.** Existence of SLIM1/EIL3 Binding Site, AYGWAYCT, in the Upstream Regions.

| Gene classification                             | Number of genes |                   | Frequencies of AYGWAYCT (%) |             |             | single-P |
|-------------------------------------------------|-----------------|-------------------|-----------------------------|-------------|-------------|----------|
|                                                 | all             | AYGWAYCT observed | specific gene class         | other genes | random rate |          |
| All genes                                       | 16,731          | 1,598             | 9.6                         | 9.0         | 13.1        | 1.000    |
| └ -S-responsive in parental line                | 469             | 54                | 11.5                        | 9.4         | 13.1        | 0.854    |
| └ ┬ SLIM1-dependent, S15>S1500 in parental line | 52              | 13                | 25.0                        | 9.4         | 12.9        | 0.013    |
| └ ┬ SLIM1-dependent, S1500>S15 in parental line | 27              | 3                 | 11.1                        | 9.4         | 13.0        | 0.698    |
| └ ┬ SLIM1-dependency not significant            | 390             | 38                | 9.7                         | 9.4         | 13.1        | 0.982    |

Classifications of SLIM1-dependent genes correspond to those in Figure 5A and Supplemental Table1. AYGWAYCT sequences were searched on the 10 bp to 800 bp upstream regions of all genes. Frequencies of the binding sequence in other genes on the Affymetrix ATH-1 GeneChip, those with random base distributions (random rates), and single-P values showing the probability that this particular sequence is that common due to chance, were calculated using GeneSpring 7.2 (Silicon Genetics).
