# Supplementary material
Source: PubMed Central journal article supplement (PMC1693955)
Supplement: plntcell_tpc.106.046458_6.pdf [file plntcell_tpc.106.046458_6.pdf]

**Supplemental Table 3.** AYGWAYCT in the Upstream Regions of -S-Up-Regulated SLIM1-Dependent Genes.

| Affymetrix ID | AGI Code  | Gene Name                                                         | Distance * | AYGWAYCT Sequence    |
|---------------|-----------|-------------------------------------------------------------------|------------|----------------------|
| 253820_at     | AT4G28370 | zinc finger family protein                                        | 787<br>42  | ACGAATCT<br>ATGAATCT |
| 255679_at     | AT4G00520 | acyl-CoA thioesterase family protein                              | 759        | ATGAATCT             |
| 258983_at     | AT3G08860 | alanine-glyoxylate aminotransferase, putative                     | 747        | ACGAACCT             |
| 264652_at     | AT1G08920 | sugar transporter, putative                                       | 629        | ATGTATCT             |
| 249599_at     | AT5G37990 | S-adenosyl-L-methionine:carboxyl methyltransferase family protein | 555        | ATGAACCT             |
| 265119_at     | AT1G62570 | flavin-containing monooxygenase family protein                    | 549        | ATGAATCT             |
| 248713_at     | AT5G48180 | kelch repeat-containing protein                                   | 374        | ACGTATCT             |
| 260126_at     | AT1G36370 | glycine hydroxymethyltransferase, putative                        | 340        | ATGAATCT             |
| 256244_at     | AT3G12520 | sulfate transporter (SULTR4;2)                                    | 262        | ATGAACCT             |
| 249934_at     | AT5G22410 | peroxidase ATP14a                                                 | 240        | ACGTATCT             |
| 259133_at     | AT3G05400 | sugar transporter, putative                                       | 206        | ATGAACCT             |
| 256061_at     | AT1G07040 | expressed protein                                                 | 125        | ACGAATCT             |
| 249033_at     | AT5G44920 | Toll-Interleukin-Resistance (TIR) domain-containing protein       | 21         | ACGAACCT             |

\* Positions of AYGWAYCT sequences between the 10 bp to 800 bp upstream regions of -S-responsive SLIM1-dependent genes whose transcript levels are S15>S1500 in parental line (Supplemental Table 2).
