# Supplementary material
Source: PubMed Central journal article supplement (PMC1693955)
Supplement: plntcell_tpc.106.046458_7.pdf [file plntcell_tpc.106.046458_7.pdf]

**Supplemental Table 4.** Molecular Markers Generated for Identification of *slim1*.

| Marker | BAC    | Position on BAC | Type  | Restriction Enzyme |            | Size               | Oligonucleotides                                                       |
|--------|--------|-----------------|-------|--------------------|------------|--------------------|------------------------------------------------------------------------|
| 481221 | T9L24  | 13123           | CAPS  | EcoRV              | Col<br>Ler | 505 and 171<br>676 | F TTCCATGGCTTTAGTACGTG<br>R AAGGAAAATGACCAACGAGA                       |
| 468370 | F25P22 | 13934           | dCAPS | NlaIV              | Col<br>Ler | 103<br>132         | F GTTCTTTAATggtgcaaattctgatgGctc<br>R GGTC AACGTCGTGAACTAAATTACGTGAAGT |
| 467081 | F25P22 | 65243           | CAPS  | AluI               | Col<br>Ler | 508<br>462         | F TCCTTTGCAAGATCCATGTC<br>R TTGACTTGGTTTGAGTCCTT                       |
| 469255 | F25P22 | 99632           | dCAPS | HinI               | Col<br>Ler | 171<br>198         | F GATGCAGCATCAGACGTAATCTCGCTGAGT<br>R ACTTCAGCATCAGCCTCAGAGACTTCAGA    |
| 472525 | F2P9   | 58650           | CAPS  | DraI               | Col<br>Ler | 803<br>477 and 326 | F ACATGGGTTGACATCACCAA<br>R TTCTGCCGGTTTCTTCATCC                       |
| 469844 | F1O17  | 9316            | SSLP  | -                  | Col<br>Ler | 222<br>184         | F CTTCGCCGAAATAGGCAAAC<br>R GGAGCTCTTTTCTCCTTGCT                       |
