# Supplementary material
Source: PubMed Central journal article supplement (PMC1693955)
Supplement: plntcell_tpc.106.046458_8.pdf [file plntcell_tpc.106.046458_8.pdf]

**Supplemental Table 5.** Primers for Construction of Plant Transformation Vectors.

| Construct                    |               | Oligonucleotides (5' to 3')                                           | Purpose                                                                                                                               |
|------------------------------|---------------|-----------------------------------------------------------------------|---------------------------------------------------------------------------------------------------------------------------------------|
| <i>P<sub>SLIM1</sub>-GFP</i> | F             | aagcttgcctgcctgcaggctgcacTAGAGATGGCGAGAAGAAGCTGAAAGAGTCA              | amplification of SLIM1 promoter region for cloning in pBI101-GFP vector using In-Fusion System (Clontech)                             |
|                              | R             | tcctcgccttgcctcaccatggatccTTAAACAAAATCAATCAAAAACCTTTAAACAACGATAATCTGA | amplification of SLIM1 promoter region for cloning in pBI101-GFP vector using In-Fusion System (Clontech)                             |
| <i>35S-SLIM1</i>             | F (1st PCR)   | ATGGGCGATCTTGCTATGTCCGTAGCAGACATCAGGATGGAGAATGAGCCTGATGA              | amplification of SLIM1 coding region eliminating the 1st intron                                                                       |
|                              | F (2nd PCR)   | gagagaacacgggggactctagATGGGCGATCTTGCTATGTCCGT                         | amplification of SLIM1 coding region for cloning in pSMAH621 using In-Fusion System (Clontech)                                        |
|                              | R             | aacgatcggggaaattcgagctCTAAGCTCCAACCATGAGAAATCATCA                     | amplification of SLIM1 coding region for cloning in pSMAH621 using In-Fusion System (Clontech)                                        |
| <i>35S-GFP-SLIM1</i>         | F (for GFP)   | tctagaCCATGGTGAGCAAGGGCGAGGAGCTG                                      | amplification of GFP coding region and creation of XbaI site for cloning in pBI121                                                    |
|                              | R (for GFP)   | ggatcctcctccCTTGACAGCTCGTCCATGCCG                                     | amplification of GFP coding region and creation of BamHI site for translational fusion                                                |
|                              | F (for SLIM1) | ggatccATGGGCGATCTTGCTATGTCCGTAGCAGA                                   | amplification of SLIM1 coding region and creation of BamHI site for translational fusion                                              |
|                              | R (for SLIM1) | gcggccgCTAAGCTCCAACCATGAGAAATCATCACAAAACCA                            | amplification of SLIM1 coding region and creation of NotI site for cloning in pBI121                                                  |
| <i>35S-EIN3</i>              | F             | caccATGATGTTTAATGAGATGGGAATGTG                                        | amplification of EIN3 coding region for GATEWAY cloning (Invitrogen) and subsequent conversion to the destination vector pH35GS       |
|                              | R             | TTAGAACCATATGGATACATCTTGCTGCTTCTGCT                                   |                                                                                                                                       |
| <i>35S-EIL2</i>              | F             | caccATGGATATGTATAACAACAATATAGGGATGTTCCGGA                             | amplification of EIL2 coding region for GATEWAY cloning (Invitrogen) and subsequent conversion to the destination vector pH35GS       |
|                              | R             | TTACTGAATCCAAGATGTGGGCAACTCTTGCCCT                                    |                                                                                                                                       |
| <i>35S-EIL4</i>              | F             | caccATGGTGGAAGTCGAAGAATTGGAACCA                                       | amplification of EIL4 coding region for GATEWAY cloning (Invitrogen) and subsequent conversion to the destination vector pH35GS       |
|                              | R             | TTAATCGAACATGTATATGTCTTTGTCTCGCAACCCATGT                              |                                                                                                                                       |
| <i>35S-EIL5</i>              | F             | caccATGGTGAGGTCCAAGATTTAGAACCA                                        | amplification of EIL5 coding region for GATEWAY cloning (Invitrogen) and subsequent conversion to the destination vector pH35GS       |
|                              | R             | TCAATCTTGAGACATATAAATATCTTTGTCTTCAACCCATG                             |                                                                                                                                       |
| <i>35S-OsSLIM1;1</i>         | F             | caccATGGGCAATCCTTCTATTCTCACGGAGGATTTAGGCCGA                           | amplification of Os SLIM1;1 coding region for GATEWAY cloning (Invitrogen) and subsequent conversion to the destination vector pH35GS |
|                              | R             | TTATGTTCCCAGATATGGCATTATATCATCATCTAGCAATACACCG                        |                                                                                                                                       |
| <i>35S-OsSLIM1;2</i>         | F             | caccATGGATCATCTGGCTATCATTGCGACGGAGT                                   | amplification of Os SLIM1;2 coding region for GATEWAY cloning (Invitrogen) and subsequent conversion to the destination vector pH35GS |
|                              | R             | TTATGTTCCCAAGTATTCCATTAGATCATCATGCAGCA                                |                                                                                                                                       |
