# Supplementary material
Source: PubMed Central journal article supplement (PMC1693955)
Supplement: plntcell_tpc.106.046458_9.pdf [file plntcell_tpc.106.046458_9.pdf]

**Supplemental Table 6.** Gene-Specific Primers for Quantitative Real-Time PCR.

| <b>AGI Code</b> | <b>Gene Name</b> |   | <b>Oligonucleotides (5' to 3')</b> |
|-----------------|------------------|---|------------------------------------|
| At2g44460       | Thioglucosidase  | F | TTGCCACTGAACTAGATTGGCA             |
|                 |                  | R | GGATCGGCTTGTGGAATATGAG             |
| At4g08620       | SULTR1;1         | F | GCCATCACAATCGCTCTCCAA              |
|                 |                  | R | TTGCCAATTCCACCCATGC                |
| At3g12520       | SULTR4;2         | F | ATTGTTCGAATCGATGCTCCC              |
|                 |                  | R | CCCTTGCTTGTGTGTTTGTCTG             |
| At1g78000       | SULTR1;2         | F | GGATCCAGAGATGGCTACATGA             |
|                 |                  | R | TCGATGTCCGTAACAGGTGAC              |
| At3g19710       | BCAT             | F | CAGAAGATGGTCGGATTCTGCTA            |
|                 |                  | R | GGCAAAGCTGTGAAGGTGGT               |
| At1g16400       | CYP79F2          | F | CCCATAATAGACGAGAGGGTCGAAA          |
|                 |                  | R | CGATCGCTGCTATACAAAATTCG            |
| At4g39950       | CYP79B2          | F | AAATCAAACCCACCATTAAGGAG            |
|                 |                  | R | GAGAATCTCCGGTTTGTTCAC              |
| At5g43780       | APS4             | F | GCTTAGCATGGCACCAGGACTT             |
|                 |                  | R | GCCAACCCACGCATCTTGTT               |
